# Supplementary material for: Investigation on the catalytic behavior of a novel thulium-organic framework with a planar tetranuclear {Tm4} cluster as the active center for chemical CO2 fixation
Source: Royal Society of Chemistry journal article supplement (doi:10.1039/d1dt03646g), 2021-12-06
Supplement: d1dt03646g1.pdf [file d1dt03646g1.pdf]

## *Supporting Information*

# **Investigation on the Catalytic Behavior of one Novel Thulium-Organic Framework with Planar Tetranuclear {Tm<sub>4</sub>} Cluster as Active Center for 5 Chemical CO<sub>2</sub> Fixation**

Hongtai Chen,<sup>a</sup> Zhengguo Zhang,<sup>a</sup> Hongxiao Lv,<sup>a</sup> Shurong Liu,<sup>a</sup> and Xiutang Zhang<sup>\*a</sup>

<sup>a</sup> *Department of Chemistry, College of Science, North University of China, Taiyuan 030051, People's Republic of China.*

*E-mail: xiutangzhang@163.com*

## Contents

Table S1. Crystallographic data and refinement parameters of NUC-37.

Table S2. Selected bond lengths and angles of NUC-37.

Table S3. Comparison of the catalytic activity of various MOFs for the cycloaddition reaction of CO<sub>2</sub> with styrene oxide.

5 Figure S1. The coordination mode of tetranuclear {Tm<sup>III</sup>}<sub>4</sub> cluster (a); the thulium-hydroxide structure (b); the coordination mode of H<sub>5</sub>BDCP ligand.

Figure S2. TGA curve of as-synthesized (black) and activated (red) sample of NUC-37.

Figure S3. IR spectra of as-synthesized NUC-37.

Figure S4 PXRD patterns of NUC-37 before and after activation.

10 Isothermic heat calculation.

Figure S5. N<sub>2</sub> absorption and desorption isotherms of NUC-37a at 77 K (insert: the pore size distribution).

Figure S6. Adsorption isotherm of CO<sub>2</sub> at 273K and 298K.

Figure S7. CO<sub>2</sub> adsorption heat calculated by the virial equation of NUC-37a.

Yield calculation based on the GC-MS analysis.

15 Figure S8-S12. The <sup>1</sup>H NMR spectrums of cycloaddition reaction products.

Figure S13. PXRD patterns of fresh and reused NUC-37a catalyst.

Figure S14. The hot filtration experiment of cycloaddition reaction catalysed by NUC-37a.

**Table S1. crystallographic data and refinement parameters of NUC-37.**

|                                          |                                                                                |
|------------------------------------------|--------------------------------------------------------------------------------|
| Complex                                  | NUC-37                                                                         |
| Formula                                  | C <sub>72</sub> H <sub>64</sub> N <sub>7</sub> O <sub>35</sub> Tm <sub>4</sub> |
| Mr                                       | 2263.02                                                                        |
| Crystal system                           | hexagonal                                                                      |
| Space group                              | P6 <sub>3</sub> /mcm                                                           |
| a (Å)                                    | 22.120(4)                                                                      |
| b (Å)                                    | 22.120(4)                                                                      |
| c (Å)                                    | 38.202(8)                                                                      |
| α (°)                                    | 90                                                                             |
| β (°)                                    | 90                                                                             |
| γ (°)                                    | 120                                                                            |
| V(Å <sup>3</sup> )                       | 16188(7)                                                                       |
| Z                                        | 6                                                                              |
| Dcalcd(g·cm <sup>-3</sup> )              | 1.393                                                                          |
| μ(mm <sup>-1</sup> )                     | 3.326                                                                          |
| GOF                                      | 1.070                                                                          |
| R <sub>1</sub> [I > 2σ(I)] <sup>a</sup>  | 0.0379                                                                         |
| wR <sub>2</sub> [I > 2σ(I)] <sup>b</sup> | 0.0969                                                                         |
| R <sub>1</sub> <sup>a</sup> (all data)   | 0.0497                                                                         |
| wR <sub>2</sub> <sup>b</sup> (all data)  | 0.1044                                                                         |
| R <sub>int</sub>                         | 0.1094                                                                         |

<sup>a</sup>  $R_1 = \sum |F_o| - |F_c| / \sum |F_o|$ . <sup>b</sup>  $wR_2 = \sum w(|F_o|^2 - |F_c|^2) / \sum w(F_o)^2)^{1/2}$

**Table S2. selected bond lengths and angles of NUC-37.**

|                                                                                                                                                                                                             |            |                |            |                |            |
|-------------------------------------------------------------------------------------------------------------------------------------------------------------------------------------------------------------|------------|----------------|------------|----------------|------------|
| Tm1-O1#1                                                                                                                                                                                                    | 2.228(4)   | Tm1-O1#2       | 2.228(4)   | Tm1-O3         | 2.202(4)   |
| Tm1-O3#3                                                                                                                                                                                                    | 2.202(4)   | Tm1-O5#5       | 2.292(6)   | Tm1-O5#4       | 2.292(6)   |
| Tm1-O1W                                                                                                                                                                                                     | 2.309(4)   | Tm2-O2#1       | 2.323(4)   | Tm2-O2#7       | 2.323(4)   |
| Tm2-O4                                                                                                                                                                                                      | 2.272(4)   | Tm2-O4#8       | 2.273(4)   | Tm2-O1W#8      | 2.312(2)   |
| Tm2-O1W                                                                                                                                                                                                     | 2.312(2)   | Tm2-O6         | 2.326(6)   | Tm2-O2W        | 2.552(8)   |
| O1#1-Tm1-O1#2                                                                                                                                                                                               | 86.6(2)    | O1#2-Tm1-O5#4  | 115.9(2)   | O1#1-Tm1-O5#4  | 81.7(2)    |
| O1#1-Tm1-O5#3                                                                                                                                                                                               | 115.9(2)   | O1#2-Tm1-O5#3  | 81.7(2)    | O1#2-Tm1-O1W   | 79.72(12)  |
| O1#1-Tm1-O1W                                                                                                                                                                                                | 79.72(12)  | O3-Tm1-O1#2    | 89.76(17)  | O3#5-Tm1-O1#1  | 89.76(17)  |
| O3#5-Tm1-O1#2                                                                                                                                                                                               | 162.04(15) | O3-Tm1-O1#1    | 162.04(15) | O3-Tm1-O3#5    | 88.3(2)    |
| O3-Tm1-O5#3                                                                                                                                                                                                 | 80.8(2)    | O3#5-Tm1-O5#3  | 115.5(2)   | O3-Tm1-O5#4    | 115.5(2)   |
| O3#5-Tm1-O5#4                                                                                                                                                                                               | 80.8(2)    | O3-Tm1-O1W     | 82.32(14)  | O3#5-Tm1-O1W   | 82.32(14)  |
| O5#3-Tm1-O5#4                                                                                                                                                                                               | 50.2(4)    | O5#3-Tm1-O1W   | 154.89(18) | O5#4-Tm1-O1W   | 154.89(18) |
| O2#6-Tm2-O2#2                                                                                                                                                                                               | 74.90(19)  | O2#2-Tm2-O6    | 141.48(10) | O2#6-Tm2-O6    | 141.48(10) |
| O2#6-Tm2-O2W                                                                                                                                                                                                | 70.5(2)    | O2#2-Tm2-O2W   | 70.5(2)    | O4-Tm2-O2#2    | 82.16(16)  |
| O4#8-Tm2-O2#6                                                                                                                                                                                               | 82.15(16)  | O4#8-Tm2-O2#2  | 136.78(15) | O4-Tm2-O2#6    | 136.78(15) |
| O4#8-Tm2-O4                                                                                                                                                                                                 | 90.7(2)    | O4#8-Tm2-O1W   | 147.83(16) | O4#8-Tm2-O1W#8 | 92.31(14)  |
| O4-Tm2-O1W#8                                                                                                                                                                                                | 147.82(16) | O4-Tm2-O1W     | 92.31(14)  | O4-Tm2-O6      | 74.55(16)  |
| O4#8-Tm2-O6                                                                                                                                                                                                 | 74.55(16)  | O4-Tm2-O2W     | 67.43(19)  | O4#8-Tm2-O2W   | 67.43(19)  |
| O1W-Tm2-O2#2                                                                                                                                                                                                | 75.30(13)  | O1W#8-Tm2-O2#6 | 75.31(13)  | O1W-Tm2-O2#6   | 115.80(15) |
| O1W#8-Tm2-O2#2                                                                                                                                                                                              | 115.80(15) | O1W#8-Tm2-O1W  | 69.01(15)  | O1W#8-Tm2-O6   | 75.44(16)  |
| O1W-Tm2-O6                                                                                                                                                                                                  | 75.44(16)  | O1W#8-Tm2-O2W  | 142.06(12) | O1W-Tm2-O2W    | 142.06(12) |
| O6-Tm2-O2W                                                                                                                                                                                                  | 124.6(3)   |                |            |                |            |
| Symmetry transformations used to generate equivalent atoms: #1: 2-X,1-X+Y,3/2-Z; #2: 1+Y,+X,+Z; #3: 1-Y,+X-Y,+Z; #4: 1+Y,1-X+Y,1-Z; #5: 1-Y,1-X,1-Z; #6: 2-X,1-X+Y,+Z; #7: +X,+Y,3/2-Z; #8: 1-Y,+X-Y,3/2-Z. |            |                |            |                |            |

**Table S3. Comparison of the catalytic activity of various MOFs for the cycloaddition reaction of CO<sub>2</sub> with styrene oxide.**

| Catalyst                                                                     | Catalyst (mol%) | Time (h) | Pressure (MPa) | Temp. (°C) | Yield (%) | Ref.      |
|------------------------------------------------------------------------------|-----------------|----------|----------------|------------|-----------|-----------|
| Rh-PMOF-1                                                                    | 0.2             | 24       | 0.1            | 100        | 88        | S1        |
| Zn-2PDC                                                                      | 0.49            | 3        | 1              | 80         | 89        | S2        |
| TCM-16 (Zr)                                                                  | 0.5             | 16       | 0.1            | 100        | 93        | S3        |
| [Mn <sub>3</sub> L(H <sub>2</sub> O) <sub>6</sub> ·(DMA) <sub>2</sub> ]      | 0.5             | 12       | 0.2            | 80         | 94        | S4        |
| JLU-MOF58 (Zr)                                                               | 0.1             | 12       | 0.1            | 80         | 65        | S5        |
| Co <sub>6</sub> (TATAB) <sub>4</sub> (DABCO) <sub>3</sub> (H <sub>2</sub> O) | 0.2             | 15       | 0.8            | 80         | 100       | S6        |
| {Ni(muco)(bpa)(2H <sub>2</sub> O)}                                           | 0.5             | 12       | 0.8            | 80         | 81        | S7        |
| ZnMOF-1-NH <sub>2</sub>                                                      | 1               | 8        | 0.8            | 80         | 88        | S8        |
| In <sub>2</sub> (OH)(btc)(Hbtc) <sub>0.4</sub> (L) <sub>0.6</sub>            | 0.51            | 4        | 2              | 80         | 73        | S9        |
| NUC-37a                                                                      | 0.5             | 5        | 0.1            | 75         | 98        | this work |

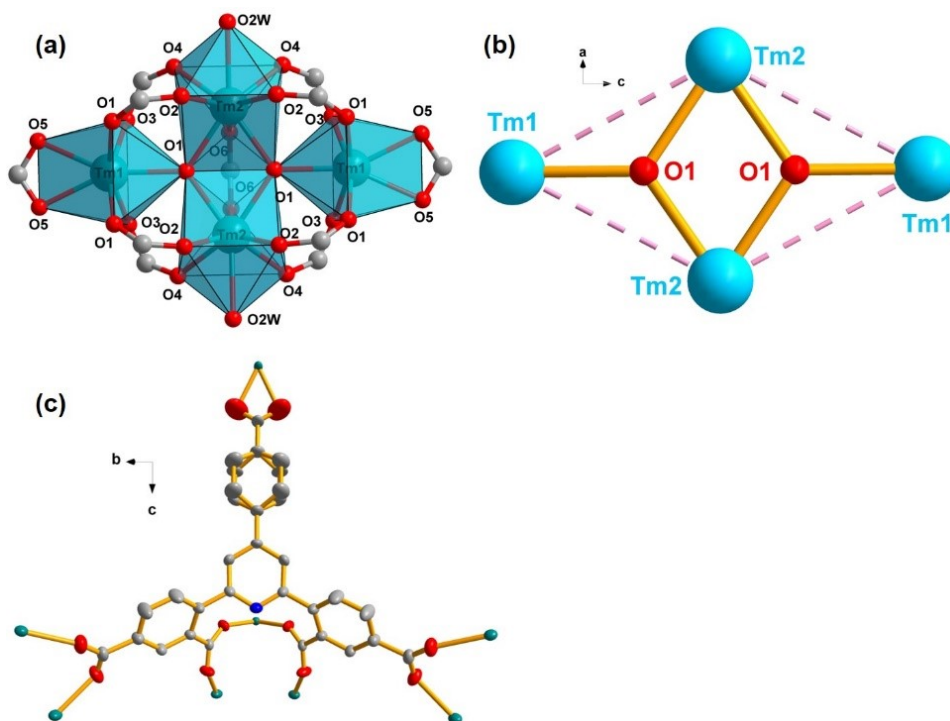

Figure S1. The coordination mode of tetranuclear  $\{\text{Tm}^{\text{III}}\}_4$  cluster (a); the thulium-hydroxide structure (b); the coordination mode of  $\text{H}_5\text{BDCP}$  ligand (containing disordered C atoms) (c).

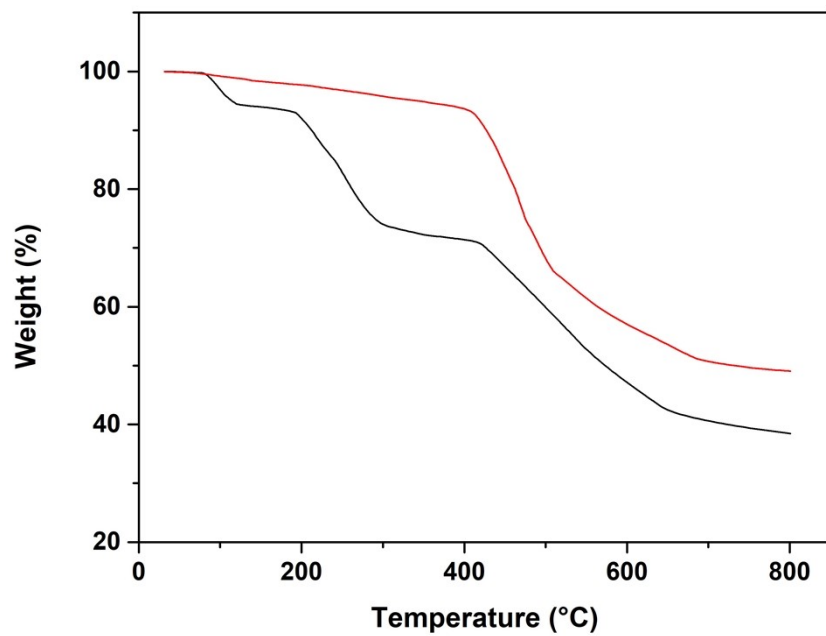

Figure S2. TGA curves of as-synthesized (black) and activated (red) sample of NUC-37.

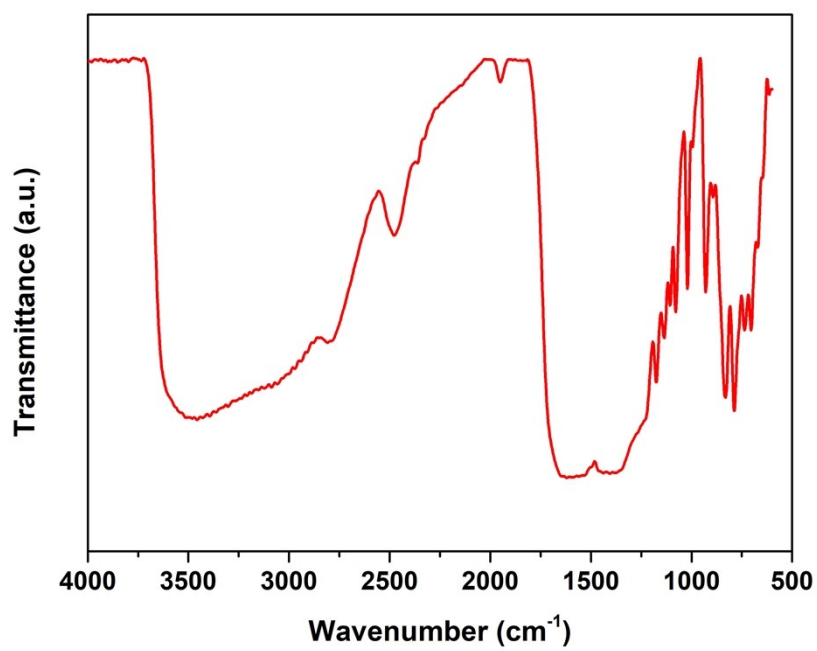

Figure S3. IR spectra of as-synthesized NUC-37.



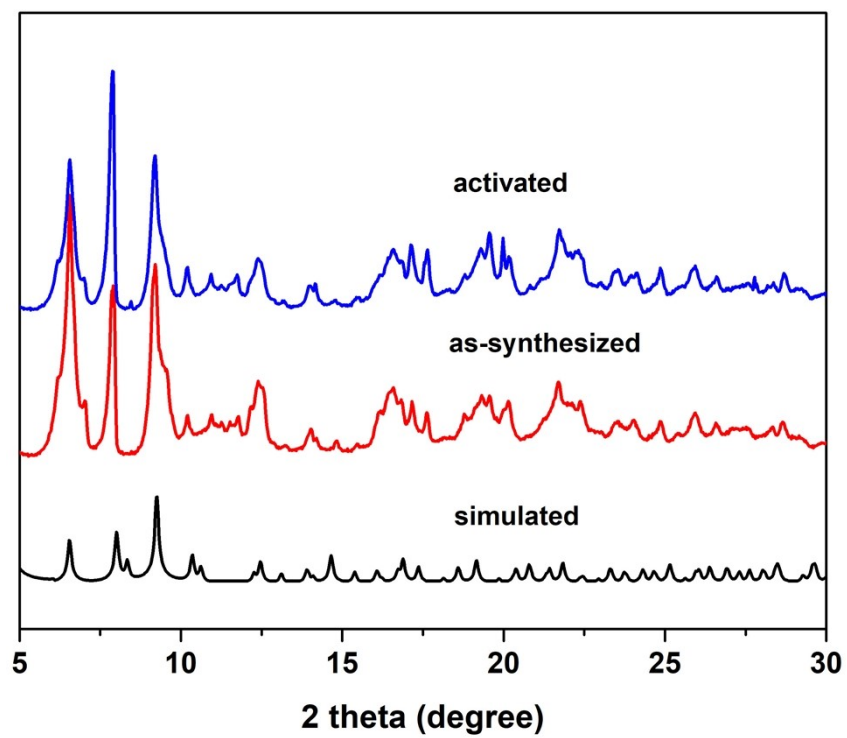

Figure S4. PXRD patterns of NUC-37 before and after activation.

### Isosteric Heat Calculation.

The  $Q_{st}$  value is a parameter that describes the average enthalpy of adsorption for an adsorbing gas molecule at a specific surface coverage and is usually evaluated using two or more adsorption isotherms collected at similar temperatures. The zero-coverage isosteric heat of adsorption is evaluated by first fitting the temperature-dependent isotherm data to a virial-type expression, which can be written

5 as:

$$\ln P = \ln N + \frac{1}{T} \sum_{i=0}^m a_i N^i + \sum_{i=0}^n b_i N^i \quad (1)$$

$$Q_{st} = -R \sum_{i=0}^m a_i N^i \quad (2)$$

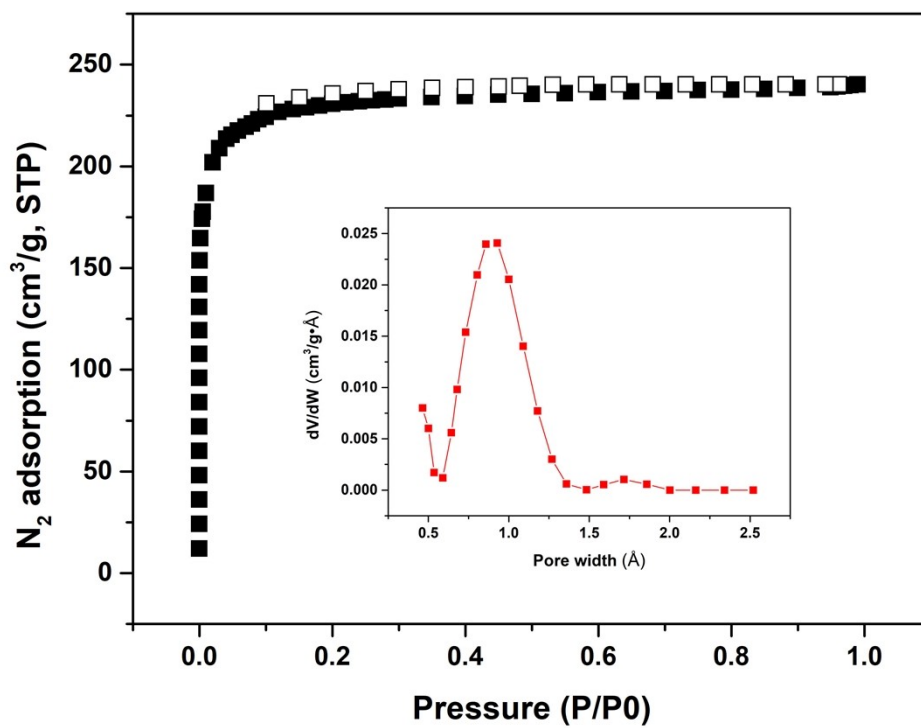

Figure S5. N<sub>2</sub> adsorption and desorption isotherms of NUC-37a at 77 K (insert: the pore size distribution).

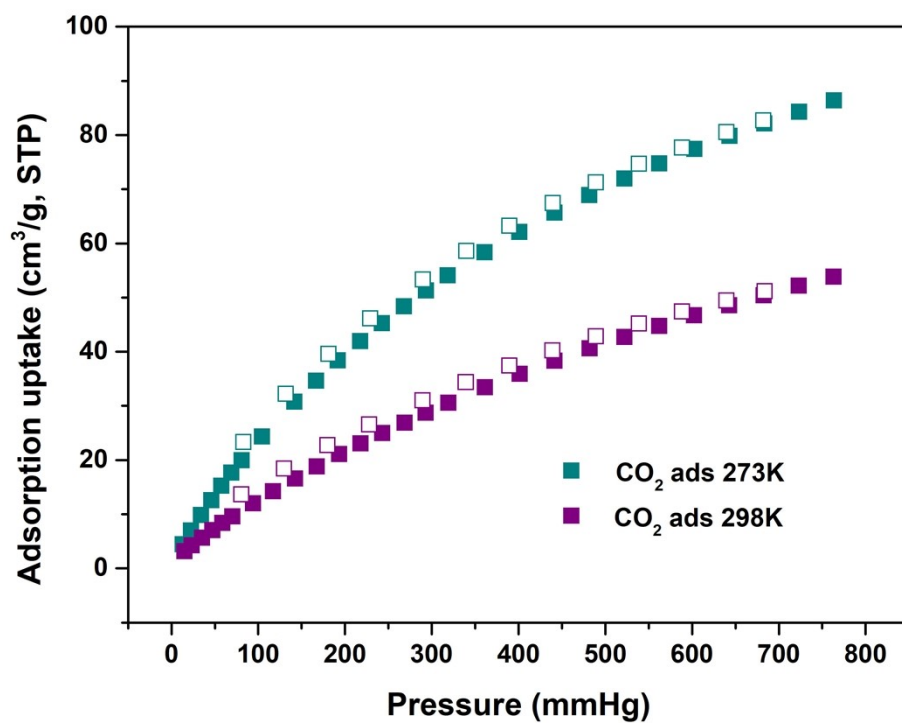

Figure S6. Adsorption isotherm of CO<sub>2</sub> at 273K and 298K.

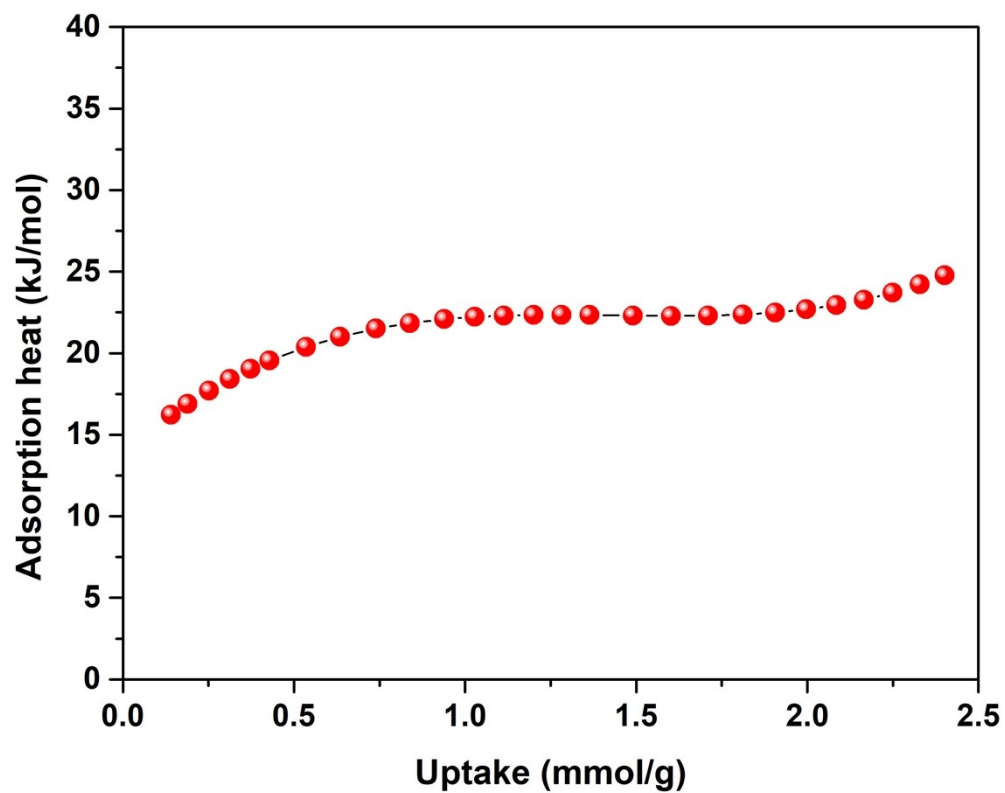

Figure S7. CO<sub>2</sub> adsorption heat calculated by the virial equation of NUC-37a.

### Yield Calculation Based on the GC-MS Analysis

Gas chromatography mass spectrometry (GC-MS) analyses were performed on a time-of-flight Thermo Fisher Trace ISQ GC/MS instrument, the yield (%) was calculated based on the consumption of starting material using the equation:

$$5 \quad \text{Yield (\%)} = \left( \frac{\frac{\text{area of reactant at 0 hour}}{\text{area of internal standard at 0 hour}} - \frac{\text{area of reactant at any time}}{\text{area of internal standard at any time}}}{\frac{\text{area of reactant at 0 hour}}{\text{area of internal standard at 0 hour}}} \right) \times 100\% \quad (3)$$

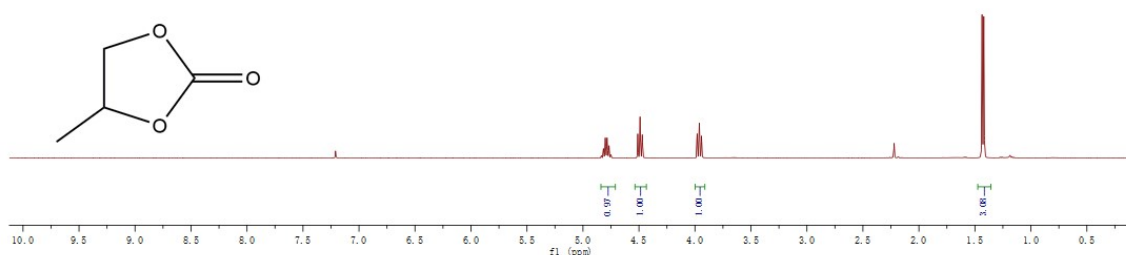

Figure S8. The  $^1\text{H}$  NMR spectrum of 4-methyl-1,3-dioxolan-2-one (Figure 3, entry 1).

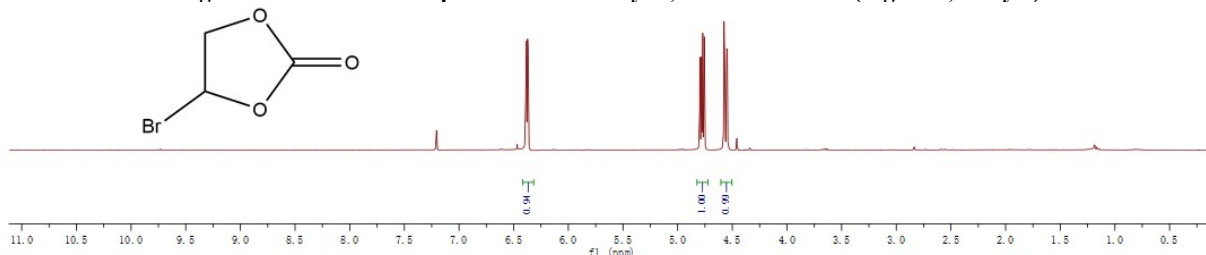

Figure S9. The  $^1\text{H}$  NMR spectrum of 4-bromo-1,3-dioxolan-2-one (Figure 3, entry 2).

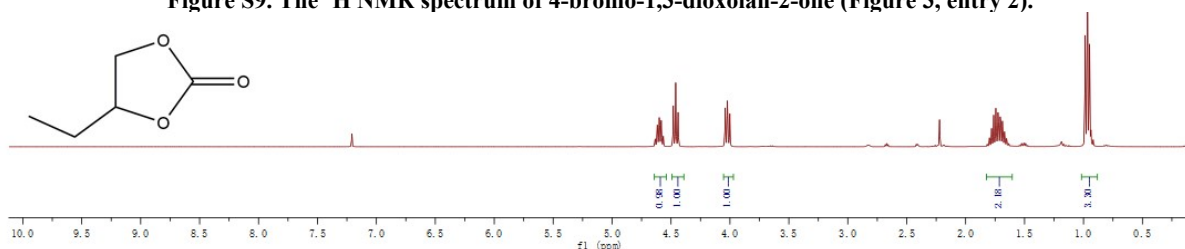

Figure S10. The  $^1\text{H}$  NMR spectrum of 4-ethyl-1,3-dioxolan-2-one (Figure 3, entry 3).

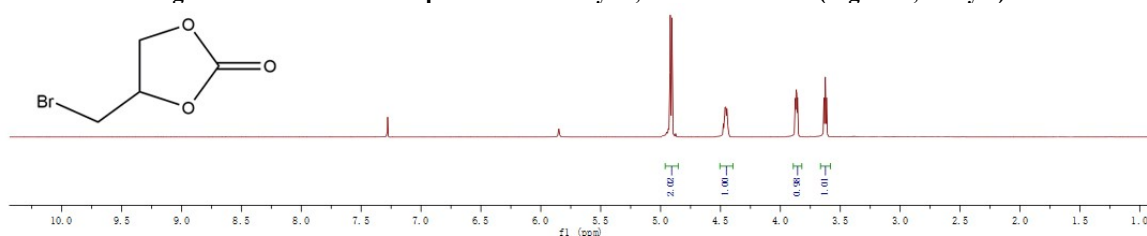

Figure S11. The  $^1\text{H}$  NMR spectrum of 4-(bromomethyl)-1,3-dioxolan-2-one (Figure 3, entry 4).

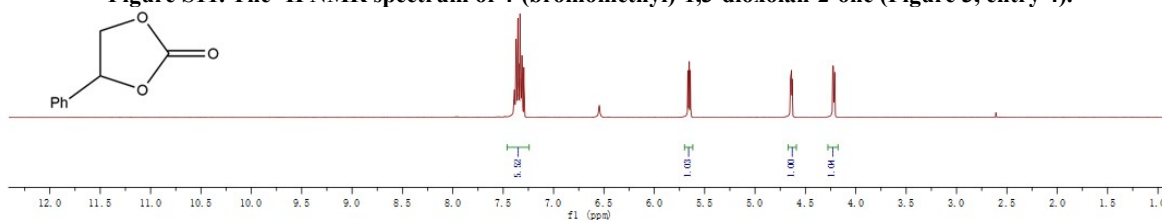

Figure S12. The  $^1\text{H}$  NMR spectrum of 4-phenyl-1,3-dioxolan-2-one (Figure 3, entry 5).

5

10

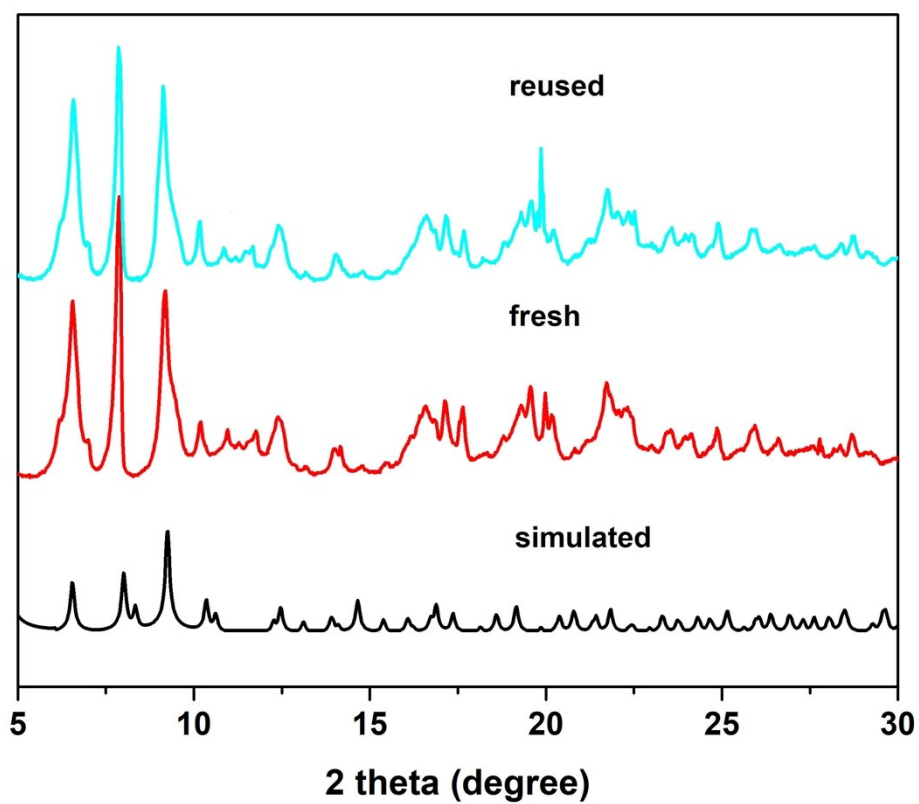

Figure S13. PXRD patterns of fresh and reused NUC-37a catalyst.



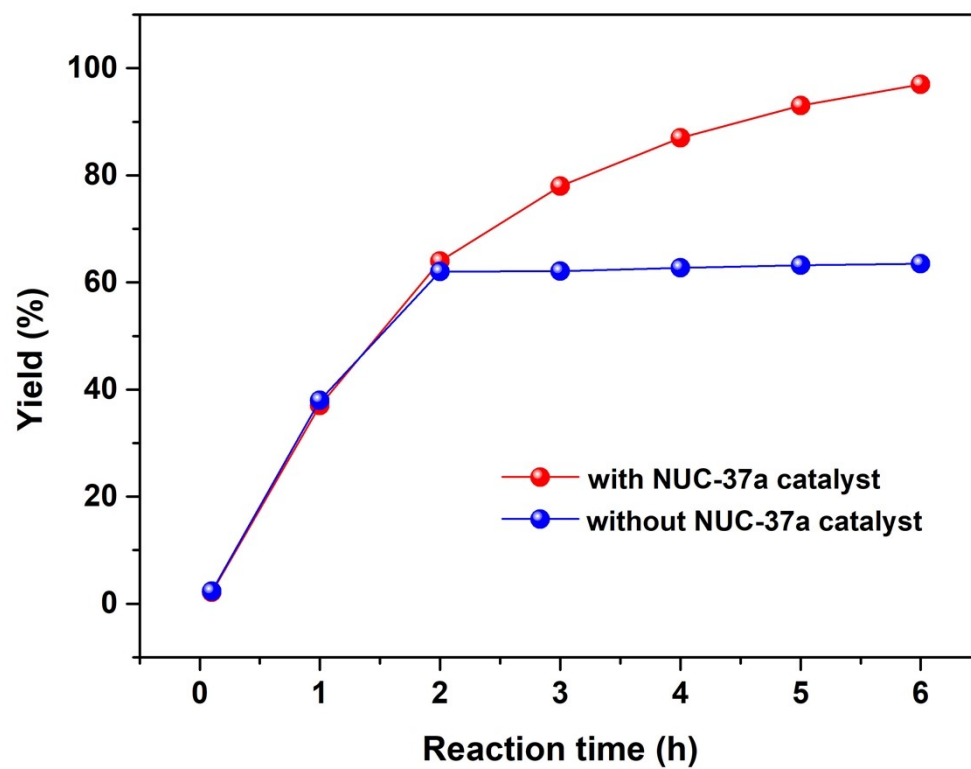

Figure S14. The hot filtration experiment of cycloaddition reaction catalysed by NUC-37a.

## Reference

- (S1) J. Liu, Y. Z. Fan, X. Li, Y. W. Xu, L. Zhang and C. Y. Su, *ChemSusChem*, 2018, **11**, 2340–2347.
- (S2) Y. Li, X. Zhang, J. Lan, D. Li, Z. Wang, P. Xu and J. Sun, *ACS Sustainable Chem. Eng.*, 2021, **9**, 2795–2803.
- (S3) G. Jin, D. Sensharma, N. Zhu, S. Vaesen and W. Schmitt, *Dalton Trans.*, 2019, **48**, 15487–15492.
- 5 (S4) W. Jiang, J. Yang, Y. Y. Liu, S. Y. Song and J. F. Ma, *Chem. Eur. J.*, 2016, **22**, 16991–16997.
- (S5) X. Sun, J. Gu, Y. Yuan, C. Yu, J. Li, H. Shan, G. Li and Y. Liu, *Inorg. Chem.*, 2019, **58**, 7480–7487.
- (S6) B. Ugale, S. Kumar, T. J. Dhilip Kumar and C. M. Nagaraja, *Inorg. Chem.*, 2019, **58**, 3925–3936.
- (S7) B. Ugale, S. S. Dhankhar and C. M. Nagaraja, *Inorg. Chem.*, 2016, **55**, 9757–9766.
- (S8) P. Patel, B. Parmar, R. I. Kureshy, N. H. Khan and E. Suresh, *Dalton Trans.*, 2018, **47**, 8041–8051.
- 10 (S9) L. Liu, S. M. Wang, Z. B. Han, M. Ding, D. Q. Yuan and H. L. Jiang, *Inorg. Chem.*, 2016, **55**, 3558–3565.
